# Supplementary material for: Dynamic in vivo monitoring of fracture healing process in response to magnesium implant with multimodal imaging: pilot longitudinal study in a rat external fixation model
Source: Royal Society of Chemistry journal article supplement (doi:10.1039/d2bm00051b), 2022-01-01
Supplement: d2bm00051b5.pdf [file d2bm00051b5.pdf]

### Supplementary materials

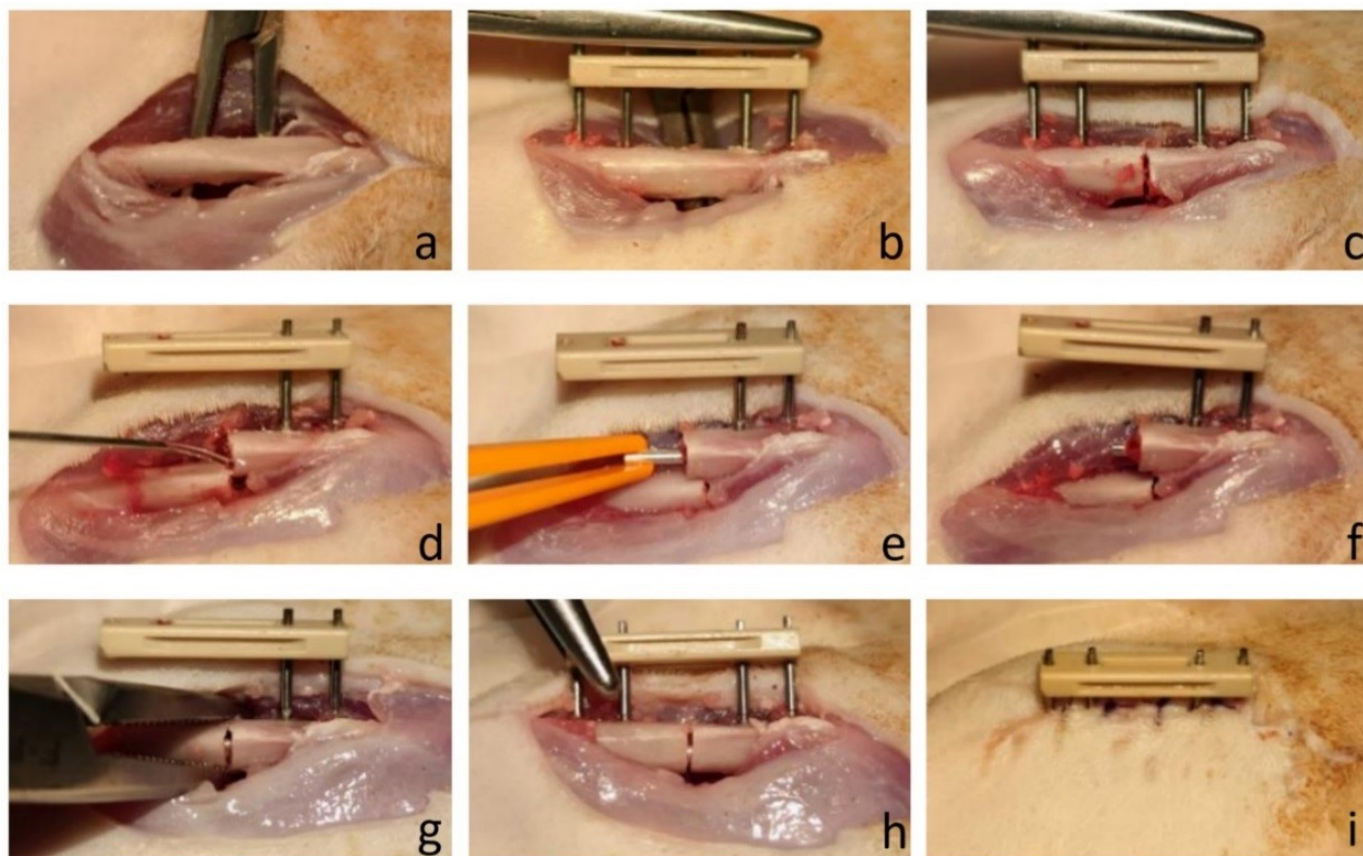

**Figure. S1. Surgical procedure.**

- a. Exposure of the femoral shaft via lateral approach;
- b. Mounting the external fixation device;
- c. Fracture induction by osteotomy;
- d. Wound irrigation to removal tissue and metal debris;
- e. Insertion of Mg pin with plastic forceps;
- f. Mg pin implantation in the medullary cavity;
- g. Fracture reduction of the distal femur;
- h. Final fracture stabilization with the fixator;
- i. Wound closure.

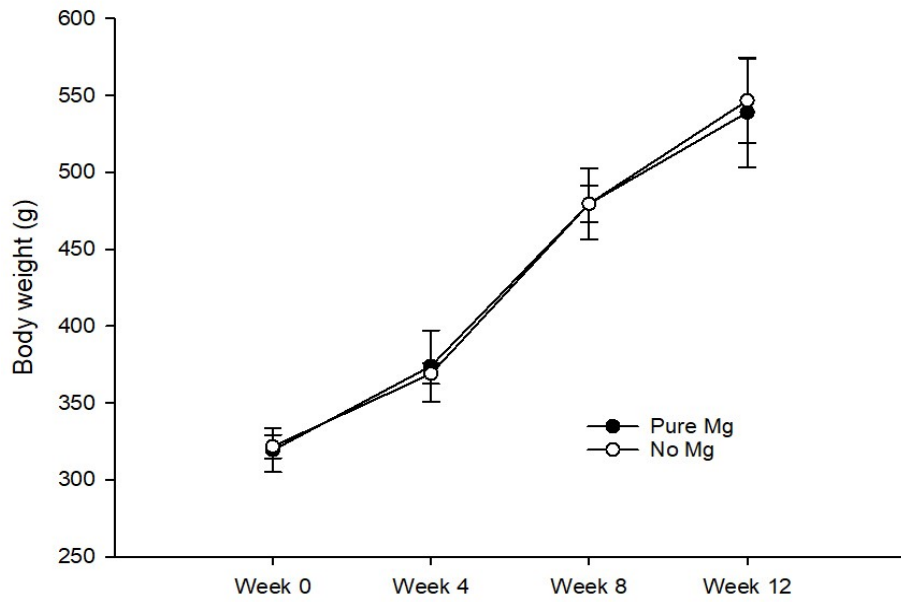

**Figure. S2. Post-operative growth curve (body weight, g)**

**Video-clip. Animal status at day-1 after surgery.**
