# Supplementary figures and images for: Dynamic in vivo monitoring of fracture healing process in response to magnesium implant with multimodal imaging: pilot longitudinal study in a rat external fixation model
Source: Royal Society of Chemistry journal article supplement (doi:10.1039/d2bm00051b), 2022-01-01

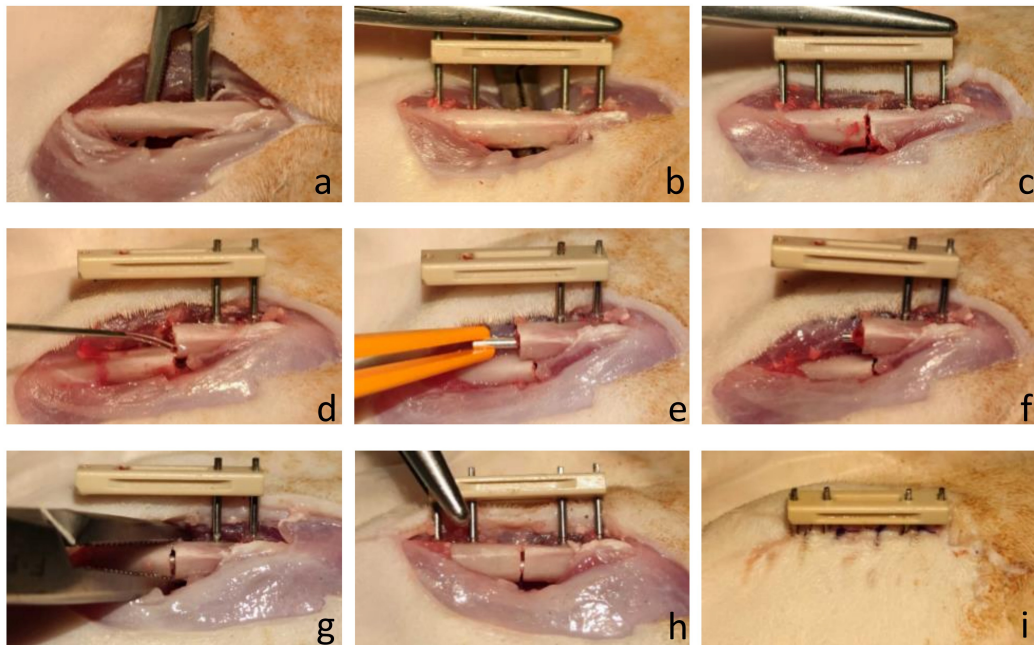

Supplement: d2bm00051b2.pdf [file d2bm00051b2.pdf]

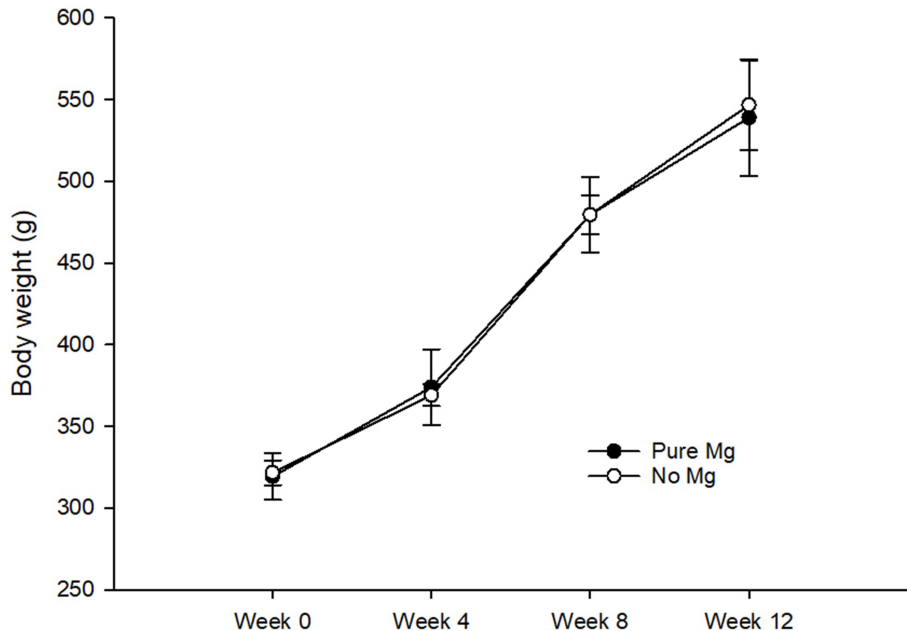

Supplement: d2bm00051b3.pdf [file d2bm00051b3.pdf]
